# Supplementary material for: Functionality and Palatability of Yogurt Produced Using Beetroot Pomace Flour Granulated with Lactic Acid Bacteria
Source: Foods. 2021 Jul 22;10(8):1696. doi: 10.3390/foods10081696 (PMC8392337; doi:10.3390/foods10081696)
Supplement: Supplementary file 1 [file foods-10-01696-s001.zip › foods-1285098.pdf]

## Supplementary

**Table S1.** The dog's signalment

| Breed                      | The total number | Neutered status                                                          |
|----------------------------|------------------|--------------------------------------------------------------------------|
| Miniature Schnauzer        | 1                | spayed female                                                            |
| Miniature Poodles          | 1                | sexually intact male                                                     |
| Maltese*                   | 1                | spayed female                                                            |
| Mongrel                    | 4                | sexually intact male<br>castrated male<br>spayed female<br>spayed female |
| Belgian Malinois           |                  | spayed female                                                            |
| Siberian Husky             | 2                | spayed female<br>sexually intact male                                    |
| Staffordshire Bull Terrier | 1                | spayed female                                                            |

\* A dog that exhibited position bias was excluded from the study.

**Table S2.** Ingredients of the commercial yogurt

| Compound    | Amount<br>[%] |
|-------------|---------------|
| Yogurt      | 78            |
| Raspberry   | 16            |
| Agave syrup | 6             |

**Table S3.** Nutritional survey. Survey respondents demographics A), dogs signalment (N=100) B), financial requirements C), and dog feeding practices D).

| A) Dog owners                                | N (%)        | B) Dogs                 | N (%) |
|----------------------------------------------|--------------|-------------------------|-------|
| <b>Gender</b>                                |              | <b>Gender</b>           |       |
| Male                                         | 19           | Male                    | 46    |
| Female                                       | 81           | Female                  | 54    |
| <b>Age</b>                                   |              | <b>Neutering status</b> |       |
| < 25                                         | 51           | Neutered                | 45    |
| 25–40                                        | 30           | Not neutered            | 55    |
| 40–60                                        | 16           | <b>Age</b>              |       |
| > 60                                         | 3            | < 1                     | 11    |
| <b>Household</b>                             |              | 1–2                     | 23    |
| Single                                       | 15           | 2–7                     | 45    |
| Couple                                       | 19           | 7–12                    | 15    |
| Family                                       | 28           | > 12                    | 6     |
| Multi-member community                       | 38           | <b>Body condition</b>   |       |
|                                              |              | Underweight             | -     |
|                                              |              | Normal weight           | 90    |
|                                              |              | Overweight              | 10    |
| <b>C) Financial requirements</b>             | <b>N (%)</b> | <b>Weight, kg</b>       |       |
| <b>Dog maintenance costs per month (EUR)</b> |              | < 8                     | 29    |
| < 50                                         | 34           | 8–12                    | 12    |
| 50–100                                       | 53           | 12–15                   | 15    |
| 100–200                                      | 11           | 15–20                   | 10    |
| >2 00                                        | 2            | 20–25                   | 12    |
| <b>The most common source of cost</b>        |              | 25–30                   | 9     |
| Dog treats                                   | 16           | 30–35                   | 6     |
| Dog health care                              | 43           | 35–45                   | 3     |
| Accommodation for dogs                       | 3            | > 45                    | 4     |
| Dog grooming salon                           | 14           | <b>Breed's size</b>     |       |
| Dog toys                                     | 9            | Small-size dogs         | 36    |
| Training equipment                           | 4            | Medium-size dogs        | 50    |
| Other                                        | 11           | Large-size dogs         | 14    |

| D) Claim                           | Viewpoint N (%) |    |              |
|------------------------------------|-----------------|----|--------------|
|                                    | Yes             | No | I don't know |
| Dogs are allowed to drink yogurt   | 67              | 29 | 4            |
| Dogs are allowed to eat beetroot   | 20              | 9  | 71           |
| A dog's diet determines its health | 95              | 2  | 3            |

## Material S Survey

### Owner data

1. Sex of the dog owner
  - ☐ Male
  - ☐ Female
2. Age of the dog owner
  - ☐ < 25
  - ☐ 25-40
  - ☐ 40-60
  - ☐ >60
3. How often do you take the dog to the veterinarian?
  - ☐ Only for vaccination
  - ☐ When it is ill
  - ☐ For vaccination and when it is ill
  - ☐ For preventive care, to check for infectious diseases or routine examinations
  - ☐ For vaccination, when it is ill, and for preventive care
  - ☐ Rarely
4. The dog lives with:
  - ☐ one owner
  - ☐ two owners (couple)
  - ☐ owner / owners with children
  - ☐ a multi-member community of people
5. The dog shares living space with:
  - ☐ other dog / dogs
  - ☐ other pets
  - ☐ other
6. The dog's diet mostly includes:

- fresh meat
- granules (dry food) intended for dog nutrition
- soft foods intended for dog nutrition
- food left over from people's meals
- heat-treated vegetables and meat prepared exclusively for pets
- equally includes soft foods and granules
- other

7. The dog lives in:

- premises of the apartment / house
- garden of the house
- other

8. The physical activity of the dog is mostly based on:

- a walk
- playing with other dogs
- running out into the garden
- sports activities for dogs (swimming, agility)
- sports activities that the owner and the dog do together (running, hunting, and hiking)
- other

9. In your opinion, your dog:

- is malnourished
- has appropriate body weight
- is obese

10. How old is your dog (years)?

- < 1
- 1–2
- 2–7
- 7–12

- > 12

11. Your dog's body weight is:

- < 8 kg
- 8–12 kg
- 12–15 kg
- 15–20 kg
- 20–25 kg
- 25–30 kg
- 30–35 kg
- 35–45 kg
- > 45 kg

12. Your dog belongs to the group:

- small dog breed
- medium dog breed
- large dog breed

13. Your dog is:

- spayed female
- castrated male
- a sexually intact female
- a sexually intact male

14. I learned what a dog should eat:

- through a conversation with a veterinarian
- through a conversation with a dog breeder
- by searching the internet
- by reading the professional literature
- by talking to friends / family who have had dogs for a long time
- all of the above

15. My dog's diet includes:

- ☐ vegetables
- ☐ fruit
- ☐ meat
- ☐ different plants
- ☐ cereals
- ☐ equally represented all of the above
- ☐ I am taking the recommended food and I have not paid attention to the ingredients

16. Dog food must not contain sugars:

- ☐ I agree
- ☐ I do not agree
- ☐ I am not sure

17. My dog sometimes refuses to eat granules (dry dog food):

- ☐ Yes
- ☐ No
- ☐ I am not sure

18. My dog often refuses to eat granules (dry dog food):

- ☐ Yes
- ☐ No
- ☐ I am not sure

19. The dog's diet determines his health:

- ☐ Yes
- ☐ No
- ☐ I am not sure

20. Do you think that sweets in a dog's diet can have negative effects on his health?

- ☐ Yes
- ☐ No

- I am not sure

21. Do you know there are treats on the market intended exclusively for dogs?

- Yes
- No

22. In addition to the standard food, I also give my dog

- dog treats (biscuits, beef veins, and dried meat)
- dog yogurt
- yogurt for human consumption
- dog ice cream
- chewing gum for dental hygiene
- dog chocolate
- none of the above

23. I give the dog treats that:

- he likes the most
- improve his immunity
- have a beneficial effect on the hair appearance
- have a beneficial effect on dental health
- have a beneficial effect on the digestive system
- have some other health benefits
- none of the above

24. How often do you give your dog treats?

- On a daily basis
- 2 to 3 times a week
- Once a week
- 2 to 3 times a month
- Once a month
- None of the above

25. Did you know that there are yogurts for dogs on the market?

- ☐ Yes
- ☐ No

26. Fermented dairy products have different effects on dog health?

- ☐ I disagree
- ☐ I agree
- ☐ I am not sure

27. Dogs can drink yogurt:

- ☐ Yes
- ☐ No
- ☐ I am not sure

28. Dogs can eat beetroot:

- ☐ Yes
- ☐ No
- ☐ I am not sure

29. My dog has a digestive disorder:

- ☐ Yes
- ☐ No

30. With commercially available food and treats for dogs, I pay attention to:

- ☐ whether and what additives there are
- ☐ whether and how much sugar there is
- ☐ I am taking the recommended food and I have not paid attention to what is in it

31. On average, I spend on a dog per month (EUR):

- ☐ < 50
- ☐ 50–100
- ☐ 100–200
- ☐ > 200

32. On an annual basis (in addition to the cost of basic food), I spend the most on:

- dog treats
- dog health care
- dog boarding houses
- dog salons
- dog toys
- dog walking and training equipment
- none of the above
